# Supplementary material for: Gut microbiome profiling of a rural and urban South African cohort reveals biomarkers of a population in lifestyle transition
Source: PubMed Central journal article supplement (PMC7603784; doi:10.1186/s12866-020-02017-w), 2020-10-31
Supplement: 12866_2020_2017_MOESM3_ESM.pdf [file 12866_2020_2017_MOESM3_ESM.pdf]

**Supplementary Data for** Oduaran, OH., Tamburini, FB., Sahibdeen, V., Brewster, R., Gómez-Olivé, FX., Kahn, K., Norris, SA., Tollman, SM., Twine, R., Wade, AN., Wagner, RG., Lombard, Z., Bhatt, AS., Hazelhurst, S. **Gut Microbiome Profiling of a Rural and Urban South African Cohort Reveals Biomarkers of a Population in Lifestyle Transition.** It contains:

1. Extended information on the community engagement process
2. Supplementary table 1 – Table of reads tracked throughout the pre-processing step.
3. Supplementary table 2 – Complementary table with corresponding genera to DESeq's volcano plots in Figure 5.

## Community Engagement

The research team visited the Agincourt HDSS study area (rural Bushbuckridge site) during the planning phase of the study to discuss the proposed study with the Community Advisory Group (CAG), who are now permanent members of a study Research Advisory Group (RAG). Discussions with the RAG involved potential concerns of community members and reactions to collecting stool samples, as well as how to practically collect samples. It was deemed appropriate to attempt to collect stool in this population, provided that a detailed explanation of its intended usage would be provided by the trained field workers. Specifically, the RAG communicated that it was important to convey to participants that the stool would only be used solely for the proposed study, not be sold, and that any remaining sample would be disposed of after the of the study. In addition to interactive meetings with the RAG, graphical flyers with an overview of the research aims were made available to participants. An instructional video recording was provided to assist the training of field workers. It was also agreed upon that samples will be collected from participants in a culturally sensitive manner as available research stool collection kits are designed for use on Western toilets with plastic toilet seats, and most households in the study area use pit latrines with concrete or no toilet seats.

Sixty-five (65) responses were received from a follow-up survey done on the first 100 participants in the Bushbuckridge area to get their feedback on the process, with one refusal to participate. All 65 survey participants responded positively indicating an interest in future participation. Most found the instructions clear and useful, and they had not found participating embarrassing or unpleasant. Specifically, participants were asked three questions on the Likert scale (1=strongly agree, 5=strongly disagree). Questions and results were: Did you find the instructions clear (1.15),

did you find the instructions useful (1.46), did you find participation unpleasant or embarrassing (3.98). This survey was conducted telephonically, and we had a concern that the participants' responses may not have been entirely forthright. Several participants also asked about getting results back.

Following preliminary data analysis, the research team organized an interactive workshop with 18 CAG representatives on-site. The session reiterated the importance of the study, conveyed initial results, and solicited feedback from community members. Participants were encouraged to share their insights and learnings with a "concept map," a diagram that depicts relationships between different ideas, such as "bacteria", "health" and "disease. This provided the research team with a sense of the communal understanding of the study.

We struggled with deciding on the amount and type of information to report back, as DNA sequencing of stool is not a gold standard diagnostic test, and participants are used to receiving actionable health information as part of most studies at the HDSSs (e.g. HIV status or presence of a pathogen, like bilharzia). The HIV test, BMI and glucose level measurements done as part of the study were reported back. However, for microbiome data, science is not at the stage where meaningful results can be given, and so individual feedback would not be useful and may be potentially damaging and raise anxiety levels. This issue was raised with the RAG and understanding was shown. Nevertheless, we hope to work out a way of giving group feedback that be meaningful and if not useful at least interesting to our participants. In addition to the CAG's valuable advisory role to the success of the collection process, some of the participants present at

the feedback session noted the disposition of the fieldworker to be critical to their consenting to the study. We had a high participation rate in Bushbuckridge.

Supplementary Table 1

| sampleID | input  | filtered | dada_f | dada_r | merged | nonchim | % retained |
|----------|--------|----------|--------|--------|--------|---------|------------|
| FQOSV    | 221    | 28       | 23     | 8      | 2      | 2       | 0.9        |
| BZEHG    | 261    | 30       | 20     | 24     | 17     | 17      | 6.5        |
| ELHZE    | 59249  | 23257    | 22345  | 22531  | 20351  | 19560   | 33         |
| DZPJR    | 78941  | 61259    | 60582  | 60904  | 58324  | 50812   | 64.4       |
| JQKFV    | 79201  | 60111    | 59522  | 59645  | 57073  | 52180   | 65.9       |
| CSKOE    | 87888  | 63962    | 62698  | 63277  | 59393  | 53158   | 60.5       |
| HPRXQ    | 79678  | 60678    | 57951  | 59646  | 55608  | 54123   | 67.9       |
| EZWQX    | 90765  | 69328    | 68230  | 68807  | 64861  | 55860   | 61.5       |
| MB17034  | 86337  | 63630    | 62885  | 63165  | 61244  | 56491   | 65.4       |
| CXCOE    | 95563  | 68646    | 67408  | 67955  | 64188  | 56559   | 59.2       |
| EKZCV    | 84087  | 66570    | 65408  | 65927  | 62640  | 57030   | 67.8       |
| HFZEJ    | 84861  | 66266    | 65289  | 65786  | 63096  | 57102   | 67.3       |
| HVFJZ    | 87522  | 67541    | 65698  | 66633  | 62606  | 57240   | 65.4       |
| CLLYS    | 89135  | 66075    | 63092  | 64725  | 60098  | 57683   | 64.7       |
| 3602219  | 97310  | 70537    | 70234  | 70249  | 68652  | 57728   | 59.3       |
| BKHRQ    | 90134  | 70179    | 67339  | 68969  | 63296  | 58174   | 64.5       |
| CRCOS    | 99531  | 71712    | 69497  | 70910  | 66337  | 58295   | 58.6       |
| JLNGC    | 89603  | 68208    | 65491  | 67260  | 62912  | 58507   | 65.3       |
| CTBOZ    | 90932  | 70148    | 68567  | 69524  | 65440  | 58917   | 64.8       |
| CBSNC    | 88959  | 68463    | 65944  | 67349  | 62649  | 59133   | 66.5       |
| MB17068  | 96090  | 71409    | 69689  | 70688  | 66596  | 59742   | 62.2       |
| DZWHL    | 91654  | 68609    | 65757  | 67578  | 62777  | 60204   | 65.7       |
| EDFHQ    | 89675  | 69433    | 67671  | 68654  | 64944  | 60250   | 67.2       |
| MB17019  | 111382 | 81749    | 79828  | 80896  | 75914  | 60684   | 54.5       |
| 2123689  | 104000 | 77416    | 76489  | 76857  | 74556  | 62039   | 59.7       |
| CKXOB    | 101589 | 74609    | 73086  | 73712  | 70370  | 62500   | 61.5       |
| KDRZJ    | 91677  | 71626    | 69265  | 70478  | 66198  | 62715   | 68.4       |
| CWIOI    | 102654 | 73311    | 71501  | 72378  | 68660  | 62744   | 61.1       |
| 3379474  | 101349 | 75209    | 74562  | 74752  | 72254  | 63087   | 62.2       |
| JRWPH    | 96148  | 73850    | 71374  | 72997  | 68094  | 63299   | 65.8       |
| MB17104  | 104096 | 77189    | 75820  | 76450  | 72351  | 63585   | 61.1       |
| MB17074  | 102521 | 76201    | 74787  | 75508  | 72043  | 63851   | 62.3       |
| 4152135  | 102381 | 73013    | 69503  | 71691  | 66572  | 64048   | 62.6       |
| HDWHX    | 103715 | 80127    | 77257  | 79013  | 74325  | 67194   | 64.8       |
| MB17106  | 106678 | 75404    | 73635  | 74588  | 71678  | 67320   | 63.1       |
| CWQQQ    | 109737 | 77965    | 75003  | 76800  | 71818  | 67528   | 61.5       |
| CQGFO    | 100291 | 76439    | 72884  | 75187  | 69887  | 67668   | 67.5       |
| DFEZM    | 100008 | 78263    | 76831  | 77565  | 73610  | 67856   | 67.9       |
| MB17100  | 106172 | 78724    | 77320  | 78068  | 74948  | 68055   | 64.1       |
| CQMOC    | 112109 | 82733    | 81102  | 82017  | 77294  | 68125   | 60.8       |
| KLHYD    | 105653 | 81166    | 76161  | 79622  | 72057  | 68876   | 65.2       |
| CCPOB    | 104275 | 75241    | 73189  | 74410  | 71152  | 69863   | 67         |
| MB17098  | 110346 | 80484    | 78144  | 79446  | 74919  | 69903   | 63.3       |
| DKWHW    | 107960 | 81562    | 78946  | 80585  | 74967  | 69989   | 64.8       |
| 1186710  | 119766 | 87213    | 86097  | 86525  | 82376  | 70184   | 58.6       |

|          |        |        |        |        |        |       |      |
|----------|--------|--------|--------|--------|--------|-------|------|
| MB17006  | 114094 | 81610  | 80396  | 80910  | 77809  | 70412 | 61.7 |
| CLNOT    | 116654 | 86921  | 85181  | 85898  | 81823  | 70981 | 60.8 |
| CLEW     | 105355 | 80733  | 77927  | 79559  | 75031  | 70988 | 67.4 |
| DGXFB    | 109228 | 84485  | 81905  | 83483  | 78238  | 71174 | 65.2 |
| 1499095  | 121348 | 88510  | 87256  | 87818  | 83950  | 71784 | 59.2 |
| BQNHZ    | 106631 | 84129  | 82051  | 83061  | 78091  | 71997 | 67.5 |
| DGEOC    | 117073 | 87418  | 85600  | 86570  | 81266  | 73031 | 62.4 |
| HGRSG    | 115600 | 85683  | 82190  | 84356  | 78362  | 74683 | 64.6 |
| MB17015  | 118449 | 85896  | 82855  | 84544  | 79276  | 75782 | 64   |
| MB17025  | 122457 | 88214  | 84994  | 86892  | 81741  | 76358 | 62.4 |
| HEJHE    | 114424 | 87847  | 86247  | 86894  | 83058  | 76543 | 66.9 |
| MB17101  | 128797 | 91562  | 88505  | 90372  | 84780  | 76795 | 59.6 |
| 2146745  | 131577 | 96220  | 93358  | 95157  | 87402  | 77024 | 58.5 |
| MB17037  | 124490 | 90616  | 87148  | 89319  | 83290  | 77069 | 61.9 |
| 1333396  | 119574 | 88210  | 87292  | 87656  | 84892  | 77937 | 65.2 |
| MB17105  | 124277 | 91850  | 89335  | 90726  | 85634  | 79313 | 63.8 |
| MB17103  | 128835 | 94148  | 91337  | 92951  | 86381  | 79495 | 61.7 |
| CAXOE    | 131406 | 92203  | 88998  | 90767  | 84640  | 79548 | 60.5 |
| MB17010  | 130088 | 92238  | 89303  | 90824  | 84723  | 79820 | 61.4 |
| FRGPC    | 118775 | 92046  | 88694  | 90951  | 85119  | 80374 | 67.7 |
| MB17046  | 128297 | 92063  | 89635  | 90995  | 86412  | 81074 | 63.2 |
| CVQON    | 136122 | 99881  | 97233  | 98567  | 91803  | 81264 | 59.7 |
| 1597674  | 132102 | 96229  | 93445  | 94931  | 89269  | 81871 | 62   |
| DCGOV    | 136801 | 103049 | 100910 | 101898 | 96284  | 81873 | 59.8 |
| MB17069  | 128834 | 93940  | 91378  | 92807  | 88062  | 82875 | 64.3 |
| MB17102  | 137947 | 102623 | 100174 | 101529 | 95565  | 83352 | 60.4 |
| CRXON    | 134707 | 95652  | 93151  | 94585  | 89463  | 83825 | 62.2 |
| CKQOT    | 142884 | 103811 | 101098 | 102520 | 96175  | 85588 | 59.9 |
| CDKOY    | 142448 | 104694 | 102933 | 103783 | 98922  | 86555 | 60.8 |
| MB17026  | 140603 | 99778  | 97347  | 98771  | 93490  | 87292 | 62.1 |
| 3924929  | 146579 | 108039 | 105525 | 106896 | 100767 | 87705 | 59.8 |
| CHPOL    | 142979 | 105367 | 103353 | 104284 | 98503  | 88253 | 61.7 |
| MB17012  | 141069 | 103257 | 99731  | 101673 | 94412  | 88255 | 62.6 |
| DDPOG    | 140812 | 105577 | 103842 | 104622 | 100031 | 88940 | 63.2 |
| MB17018  | 142340 | 102461 | 99374  | 100964 | 95018  | 89053 | 62.6 |
| CBZOI    | 146937 | 105007 | 101134 | 103519 | 96600  | 90176 | 61.4 |
| CFIOB    | 140151 | 103323 | 100171 | 101862 | 96365  | 90491 | 64.6 |
| MB17020  | 146433 | 106246 | 103966 | 105221 | 99170  | 91100 | 62.2 |
| MB17022  | 144569 | 104954 | 101032 | 103387 | 97153  | 92392 | 63.9 |
| MB17035  | 139597 | 109066 | 107268 | 108141 | 102530 | 92745 | 66.4 |
| MB17009  | 144425 | 106449 | 102863 | 104877 | 98411  | 93387 | 64.7 |
| DDWOM    | 146125 | 109124 | 107283 | 108053 | 103246 | 93490 | 64   |
| 2554637a | 148496 | 107824 | 104137 | 106114 | 99079  | 93771 | 63.1 |
| MB17004  | 145376 | 107878 | 105405 | 106813 | 101543 | 93788 | 64.5 |
| DBTOG    | 146210 | 106496 | 103097 | 104942 | 98776  | 93843 | 64.2 |
| MB17024  | 142795 | 106336 | 103887 | 105216 | 100091 | 94073 | 65.9 |

|         |        |        |        |        |        |        |      |
|---------|--------|--------|--------|--------|--------|--------|------|
| 4971044 | 149527 | 110492 | 107192 | 108920 | 101473 | 95212  | 63.7 |
| CAWOD   | 146133 | 108965 | 105745 | 107473 | 101423 | 95406  | 65.3 |
| MB17011 | 155730 | 119301 | 117709 | 118315 | 112406 | 95471  | 61.3 |
| MB17014 | 145991 | 109956 | 107366 | 108860 | 103103 | 95653  | 65.5 |
| 3956441 | 157781 | 117044 | 114570 | 115621 | 110128 | 96666  | 61.3 |
| 3480141 | 157012 | 118951 | 117237 | 118059 | 111938 | 96945  | 61.7 |
| CCJOV   | 162002 | 117797 | 115615 | 116528 | 110823 | 97114  | 59.9 |
| MB17016 | 153942 | 110179 | 106378 | 108391 | 102536 | 97136  | 63.1 |
| 2031518 | 158401 | 116063 | 113018 | 114789 | 107345 | 97380  | 61.5 |
| MB17007 | 153383 | 111700 | 108881 | 110443 | 105064 | 97547  | 63.6 |
| CFVOM   | 155322 | 111703 | 107802 | 109994 | 103279 | 97915  | 63   |
| 2266332 | 161177 | 116488 | 112096 | 114610 | 107088 | 98029  | 60.8 |
| MB17033 | 148036 | 116348 | 115194 | 115653 | 110802 | 98378  | 66.5 |
| 1930043 | 155389 | 113739 | 110545 | 112224 | 105685 | 98421  | 63.3 |
| DDZ0Q   | 158181 | 116061 | 113120 | 114877 | 108971 | 99146  | 62.7 |
| MB17017 | 158388 | 115543 | 111503 | 113573 | 106809 | 102002 | 64.4 |
| MB17003 | 159836 | 120407 | 117932 | 119298 | 113855 | 102262 | 64   |
| DBGOS   | 161666 | 119608 | 116750 | 118222 | 111830 | 102475 | 63.4 |
| DGV05   | 163368 | 120870 | 117245 | 119148 | 111447 | 102691 | 62.9 |
| 4233802 | 168833 | 123073 | 120330 | 121710 | 114722 | 102917 | 61   |
| MB17013 | 164880 | 116367 | 113663 | 115010 | 109255 | 103812 | 63   |
| 4858889 | 167263 | 119620 | 116679 | 118139 | 111850 | 103863 | 62.1 |
| DHHOH   | 163885 | 120798 | 116516 | 119094 | 111186 | 104629 | 63.8 |
| MB17040 | 164417 | 129083 | 127289 | 128151 | 121900 | 105204 | 64   |
| MB17038 | 167023 | 130113 | 128591 | 129150 | 122719 | 106359 | 63.7 |
| MB17049 | 157620 | 125865 | 124457 | 125078 | 120475 | 106370 | 67.5 |
| GWBHF   | 158344 | 119404 | 117115 | 118158 | 114174 | 109127 | 68.9 |
| 3663723 | 177608 | 126604 | 122088 | 124932 | 116400 | 109303 | 61.5 |
| DEROK   | 176767 | 129145 | 126201 | 127920 | 121327 | 111776 | 63.2 |
| MB17039 | 170703 | 131080 | 128255 | 129769 | 122307 | 111852 | 65.5 |
| MB17085 | 171624 | 135866 | 133377 | 134567 | 127184 | 111865 | 65.2 |
| MB17091 | 162502 | 128756 | 126150 | 127514 | 120417 | 112282 | 69.1 |
| CBY0H   | 172399 | 128556 | 125033 | 127124 | 119885 | 112321 | 65.2 |
| MB17062 | 163607 | 128163 | 125487 | 126614 | 119928 | 112596 | 68.8 |
| MB17088 | 173673 | 136912 | 134212 | 135782 | 127832 | 113512 | 65.4 |
| MB17036 | 174859 | 134932 | 132893 | 133584 | 127489 | 114079 | 65.2 |
| MB17077 | 170345 | 135354 | 132636 | 134080 | 126740 | 114633 | 67.3 |
| MB17071 | 174714 | 139039 | 137211 | 137894 | 131940 | 115289 | 66   |
| MB17072 | 174424 | 136619 | 133667 | 135287 | 128698 | 116380 | 66.7 |
| MB17070 | 169222 | 134915 | 133504 | 134044 | 128750 | 119632 | 70.7 |
| MB17027 | 177523 | 137317 | 134212 | 135969 | 127980 | 120034 | 67.6 |
| MB17030 | 177181 | 135903 | 132095 | 134286 | 126536 | 120353 | 67.9 |
| MB17063 | 181513 | 143333 | 141097 | 142254 | 134917 | 121253 | 66.8 |
| MB17094 | 180477 | 140738 | 137472 | 139058 | 131279 | 123311 | 68.3 |
| MB17028 | 185251 | 143845 | 140281 | 142135 | 134055 | 124518 | 67.2 |
| MB17066 | 190850 | 150096 | 147992 | 148765 | 140834 | 124699 | 65.3 |

|         |        |        |        |        |        |        |      |
|---------|--------|--------|--------|--------|--------|--------|------|
| MB17050 | 194435 | 152281 | 147071 | 150181 | 138099 | 127985 | 65.8 |
| MB17083 | 189949 | 146771 | 142289 | 144635 | 135218 | 128085 | 67.4 |
| MB17051 | 198862 | 154044 | 150697 | 152382 | 144125 | 128548 | 64.6 |
| MB17056 | 191569 | 151059 | 147750 | 149616 | 140951 | 129497 | 67.6 |
| MB17055 | 196883 | 154371 | 152366 | 153310 | 145918 | 129518 | 65.8 |
| MB17076 | 187526 | 145907 | 142889 | 144494 | 137676 | 129583 | 69.1 |
| MB17031 | 188405 | 146317 | 140784 | 144109 | 134874 | 129823 | 68.9 |
| MB17080 | 199543 | 150525 | 145080 | 148297 | 138137 | 130264 | 65.3 |
| MB17057 | 188453 | 148631 | 144934 | 146885 | 138785 | 130916 | 69.5 |
| MB17093 | 195807 | 155302 | 151922 | 153801 | 144480 | 130996 | 66.9 |
| MB17073 | 187906 | 149353 | 146479 | 147996 | 140918 | 131684 | 70.1 |
| MB17081 | 192056 | 152849 | 150203 | 151388 | 144535 | 131885 | 68.7 |
| MB17092 | 193078 | 153367 | 149953 | 151866 | 143145 | 131937 | 68.3 |
| MB17043 | 193051 | 154712 | 152042 | 153234 | 145241 | 133495 | 69.2 |
| MB17078 | 194868 | 151560 | 146099 | 149332 | 139501 | 133539 | 68.5 |
| MB17082 | 202218 | 157475 | 152370 | 155408 | 145108 | 136915 | 67.7 |
| MB17096 | 207652 | 160900 | 157158 | 158967 | 148987 | 137091 | 66   |
| MB17061 | 205434 | 158393 | 154284 | 156690 | 147234 | 137305 | 66.8 |
| MB17045 | 191882 | 154615 | 151597 | 153264 | 145756 | 137571 | 71.7 |
| MB17075 | 206904 | 160792 | 156827 | 159085 | 149002 | 138152 | 66.8 |
| MB17097 | 198707 | 156669 | 152886 | 154924 | 146481 | 139126 | 70   |
| MB17054 | 216080 | 168465 | 165331 | 166967 | 157572 | 139749 | 64.7 |
| MB17079 | 199205 | 154322 | 150052 | 152453 | 144979 | 139869 | 70.2 |
| MB17053 | 204928 | 161070 | 156559 | 159132 | 148575 | 140004 | 68.3 |
| MB17041 | 205535 | 159110 | 154241 | 157087 | 147719 | 140273 | 68.2 |
| MB17064 | 208836 | 163161 | 158968 | 161186 | 151477 | 140677 | 67.4 |
| MB17044 | 206910 | 162028 | 157930 | 160081 | 150472 | 140686 | 68   |
| MB17067 | 215352 | 166591 | 163325 | 164818 | 154835 | 141225 | 65.6 |
| MB17059 | 213035 | 165993 | 162611 | 164283 | 154094 | 141649 | 66.5 |
| MB17058 | 221285 | 177493 | 174497 | 176162 | 167135 | 146469 | 66.2 |
| MB17047 | 218450 | 166782 | 161348 | 164443 | 153834 | 146704 | 67.2 |
| MB17042 | 214336 | 166872 | 161120 | 164305 | 153684 | 147900 | 69   |
| MB17052 | 224349 | 179346 | 175726 | 177605 | 168800 | 154124 | 68.7 |

Supplementary Table 2A

| Phylum         | Genus              | log2FoldChange | padj        |
|----------------|--------------------|----------------|-------------|
| Firmicutes     | Faecalibacterium   | -2.948289946   | 0.030143364 |
| Firmicutes     | NA                 | -3.164057658   | 0.030143364 |
| Firmicutes     | Faecalibacterium   | -4.283834853   | 0.01591297  |
| Proteobacteria | Vampirovibrio      | -27.75261479   | 8.49E-14    |
| Firmicutes     | Ruminococcus       | -10.7767581    | 5.18E-05    |
| Tenericutes    | Anaeroplasma       | -5.670916745   | 0.006513525 |
| Firmicutes     | Streptococcus      | 4.089000849    | 0.052075231 |
| Proteobacteria | Sutterella         | -25.21401389   | 1.43E-11    |
| Firmicutes     | NA                 | -8.829621222   | 0.002563705 |
| Bacteroidetes  | Prevotella         | -6.063410789   | 0.025198733 |
| Proteobacteria | Vampirovibrio      | -24.72778668   | 1.53E-12    |
| Bacteroidetes  | Alistipes          | -30            | 8.49E-14    |
| Firmicutes     | Acetanaerobacteriu | 10.6204115     | 0.03345809  |
| Firmicutes     | Gemmiger           | -5.74640603    | 0.065463474 |
| Firmicutes     | Flavonifractor     | -3.851839866   | 0.01591297  |
| Proteobacteria | Parasutterella     | -11.70775137   | 0.065056778 |



Supplementary Table 2B.

| Phylum         | Genus                | log2FoldChange | padj        |
|----------------|----------------------|----------------|-------------|
| Bacteroidetes  | NA                   | 23.07789071    | 0.004363688 |
| Firmicutes     | Clostridium_IV       | 23.80568491    | 2.59E-05    |
| Proteobacteria | Sutterella           | 23.13578032    | 1.22E-06    |
| Firmicutes     | NA                   | -9.076755715   | 0.037057223 |
| Firmicutes     | Ruminococcus         | 20.80380598    | 0.000771925 |
| Firmicutes     | Catenibacterium      | 21.51908773    | 0.000428028 |
| Bacteroidetes  | Barnesiella          | 16.61820089    | 0.055699717 |
| Bacteroidetes  | Prevotella           | 17.58681342    | 0.037057223 |
| Bacteroidetes  | Prevotella           | 19.04868921    | 0.024275008 |
| Firmicutes     | NA                   | 21.69196387    | 0.004363688 |
| Bacteroidetes  | Prevotella           | 17.57697901    | 0.055699717 |
| Proteobacteria | NA                   | -27.56742608   | 0.004363688 |
| Bacteroidetes  | Prevotella           | 20.8689034     | 0.018956964 |
| Proteobacteria | NA                   | 19.59851144    | 0.004363688 |
| Firmicutes     | Catenibacterium      | 23.08314541    | 0.004242592 |
| Bacteroidetes  | Bacteroides          | 21.00415968    | 0.043570491 |
| Proteobacteria | NA                   | 20.97086388    | 0.050245214 |
| Bacteroidetes  | Prevotella           | 18.75869803    | 0.024397052 |
| Firmicutes     | NA                   | 20.39809781    | 0.005193846 |
| Firmicutes     | Phascolarctobacterii | 19.34589557    | 0.014581396 |
| Firmicutes     | Phascolarctobacterii | 20.07233943    | 0.004363688 |
| Bacteroidetes  | Bacteroides          | -27.98005364   | 0.004363688 |
| Firmicutes     | Ruminococcus         | 19.39642463    | 0.024397052 |
| Firmicutes     | NA                   | 18.88135078    | 0.0130629   |
| Firmicutes     | Roseburia            | 19.59342593    | 0.0130629   |
| Bacteroidetes  | Bacteroides          | 19.85557246    | 0.050245214 |
| Firmicutes     | NA                   | -26.39285726   | 0.0130629   |
| Firmicutes     | Dialister            | -26.05691265   | 0.0144722   |
| Proteobacteria | Oxalobacter          | 19.6668361     | 0.005544641 |
| Firmicutes     | NA                   | 18.8726824     | 0.004363688 |
| Actinobacteria | Bifidobacterium      | 21.43003821    | 0.043570491 |
| Bacteroidetes  | Alistipes            | 20.19017854    | 0.082956833 |
| Proteobacteria | NA                   | -24.90358657   | 0.00379038  |
| Bacteroidetes  | Parabacteroides      | 19.70540334    | 0.092649195 |

Supplementary Table 2C

| Phylum     | Genus        | log2FoldChange | padj     |
|------------|--------------|----------------|----------|
| Firmicutes | Ruminococcus | -26.22798711   | 1.28E-08 |
| Firmicutes | NA           | -24.70095282   | 1.80E-06 |

Supplementary Table 2D

| Phylum        | Genus          | log2FoldChange | padj        |
|---------------|----------------|----------------|-------------|
| Firmicutes    | NA             | 21.85066972    | 1.63E-06    |
| Bacteroidetes | Prevotella     | 8.498127802    | 0.04874207  |
| Firmicutes    | NA             | 7.035533845    | 0.035013111 |
| Firmicutes    | Intestinimonas | 5.317561726    | 0.013007126 |

Supplementary Table 2E

| Phylum          | Genus                 | log2FoldChange | padj        |
|-----------------|-----------------------|----------------|-------------|
| Bacteroidetes   | Prevotella            | 7.955170427    | 0.013817339 |
| Bacteroidetes   | Prevotella            | 7.806335946    | 0.061021924 |
| Firmicutes      | Clostridium_IV        | 11.67724401    | 0.026351365 |
| Verrucomicrobia | Akkermansia           | 23.14067417    | 0.002987482 |
| Bacteroidetes   | Prevotella            | 22.98289739    | 0.000871992 |
| Proteobacteria  | Sutterella            | 22.81338015    | 1.23E-05    |
| Proteobacteria  | Vampirovibrio         | 23.60461056    | 0.000667746 |
| Firmicutes      | Ruminococcus          | 10.48231218    | 0.051180108 |
| Bacteroidetes   | NA                    | 21.74180625    | 0.042649685 |
| Firmicutes      | Phascolarctobacterium | 9.921809639    | 0.046115747 |
| Firmicutes      | Catenibacterium       | 22.0300666     | 1.81E-05    |
| Bacteroidetes   | Prevotella            | 22.27959402    | 0.000242195 |
| Bacteroidetes   | Prevotella            | 21.25744432    | 0.019972473 |
| Firmicutes      | NA                    | 22.10963911    | 0.000723139 |
| Bacteroidetes   | Prevotella            | 22.3751762     | 0.000237212 |
| Bacteroidetes   | Prevotella            | 21.23611047    | 0.001137077 |
| Firmicutes      | NA                    | 19.96218611    | 0.004182473 |
| Bacteroidetes   | Prevotella            | 21.4358074     | 0.005805978 |
| Bacteroidetes   | NA                    | 21.65551294    | 0.015792607 |
| Firmicutes      | NA                    | 21.73589394    | 0.006424543 |
| Firmicutes      | NA                    | 20.96011721    | 0.006424543 |
| Proteobacteria  | NA                    | 21.58143898    | 0.000606761 |
| Proteobacteria  | Sutterella            | 21.32126346    | 0.000667746 |
| Bacteroidetes   | Prevotella            | 22.06118089    | 0.000968635 |
| Firmicutes      | NA                    | 20.33883533    | 0.000764727 |
| Proteobacteria  | Sutterella            | 20.97976298    | 0.001490284 |
| Bacteroidetes   | Prevotella            | 21.26448207    | 0.000488866 |
| Bacteroidetes   | Parabacteroides       | 20.71567168    | 0.005805978 |
| Bacteroidetes   | Prevotella            | 21.21881664    | 0.018376084 |
| Firmicutes      | NA                    | 20.13576996    | 0.076543027 |
| Bacteroidetes   | Prevotella            | 20.84337422    | 0.01362984  |
| Firmicutes      | Phascolarctobacterium | 20.14788351    | 0.002240367 |
| Firmicutes      | NA                    | 18.8634611     | 0.013842708 |
| Bacteroidetes   | Alistipes             | 18.52687909    | 0.090741918 |
| Firmicutes      | Acetanaerobacterium   | 18.85665737    | 0.040420128 |
| Firmicutes      | NA                    | 17.85217018    | 0.042649685 |

Supplementary Table 2F

| Phylum         | Genus                | log2FoldChange | padj        |
|----------------|----------------------|----------------|-------------|
| Proteobacteria | Escherichia/Shigella | 3.456849448    | 2.51E-05    |
| Bacteroidetes  | Prevotella           | 3.274300852    | 0.027676485 |
| Firmicutes     | Oscillibacter        | 3.558253002    | 0.075784277 |
| Bacteroidetes  | Prevotella           | 3.622352002    | 0.029384796 |
| Firmicutes     | Ruminococcus         | 3.522695798    | 0.09282651  |
| Firmicutes     | NA                   | -3.197232699   | 0.060222044 |
| Bacteroidetes  | Prevotella           | 5.225332346    | 0.030918399 |
| Firmicutes     | NA                   | 3.141557796    | 0.039689525 |
| Firmicutes     | Clostridium_XIVa     | 5.709221797    | 0.034589787 |
| Bacteroidetes  | Prevotella           | 23.59680598    | 3.51E-14    |
| Firmicutes     | Fusicatenibacter     | -1.372436177   | 0.09282651  |
| Firmicutes     | Clostridium_XIVa     | 1.967631098    | 0.029542144 |
| Firmicutes     | Oscillibacter        | 3.554312373    | 0.057210422 |
| Bacteroidetes  | Prevotella           | 6.371480701    | 0.08584636  |
| Firmicutes     | Sporobacter          | 3.714138311    | 0.030918399 |
| Firmicutes     | NA                   | -1.400252229   | 0.080599776 |
| Bacteroidetes  | Prevotella           | 9.176648127    | 0.000213391 |
| Lentisphaerae  | Victivallis          | -3.273273869   | 0.078058153 |
| Firmicutes     | Clostridium_IV       | -2.082113778   | 0.010623531 |
| Proteobacteria | Haemophilus          | 3.297603024    | 0.022765633 |
| Firmicutes     | NA                   | 2.551949643    | 0.078058153 |
| Proteobacteria | Haemophilus          | 4.587783366    | 0.027676485 |
| Bacteroidetes  | Parabacteroides      | 21.87189622    | 3.51E-14    |
| Firmicutes     | Intestinimonas       | 4.471077903    | 0.006704835 |
| Firmicutes     | Clostridium_XIVb     | 4.584736133    | 0.028085092 |
| Proteobacteria | Oxalobacter          | 4.462329106    | 0.075784277 |
| Firmicutes     | Clostridium_XIVa     | 20.10712772    | 3.51E-14    |
| Firmicutes     | Streptococcus        | 2.556688889    | 0.09282651  |
| Bacteroidetes  | Parabacteroides      | -25.05231647   | 3.51E-14    |
| Firmicutes     | NA                   | -3.704455674   | 0.027676485 |
| Proteobacteria | Haemophilus          | 4.383920391    | 0.08584636  |
